# Supplementary material for: A versatile route for the fabrication of micro-patterned polylactic-acid (PLA)-based membranes with tailored morphology via breath figure imprinting
Source: Royal Society of Chemistry journal article supplement (doi:10.1039/d4sm00107a), 2024-01-01
Supplement: d4sm00107a1.pdf [file d4sm00107a1.pdf]

### Electronic Support Information.

A versatile route for the fabrication of micro-patterned Poly(lactic-acid) (PLA)-based membranes with tailored morphology via breath figure imprinting

Rayane Akoume<sup>1\*</sup>, Manale Noun<sup>2</sup>, Deepalekshmi Ponnamma<sup>3</sup>, Maryam Al-Ejji<sup>1</sup>, Khadija M. Zadeh<sup>1</sup>, Alaa H. Hawari<sup>4</sup>, Kenan Song<sup>5</sup>, Mohamad Hassan<sup>1\*</sup>.

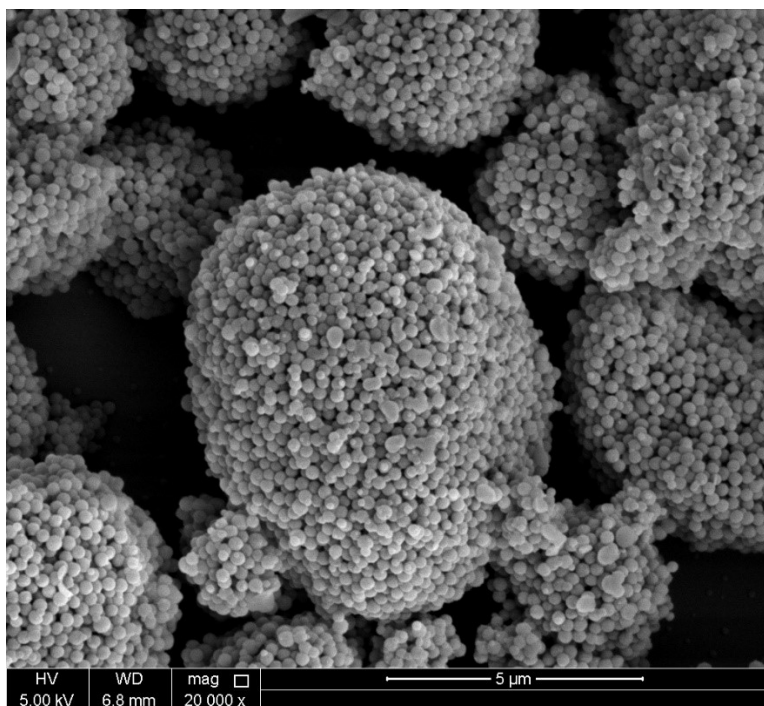

**Figure 1.** SEM image for the PVDF aggregate at 5 μm scale.

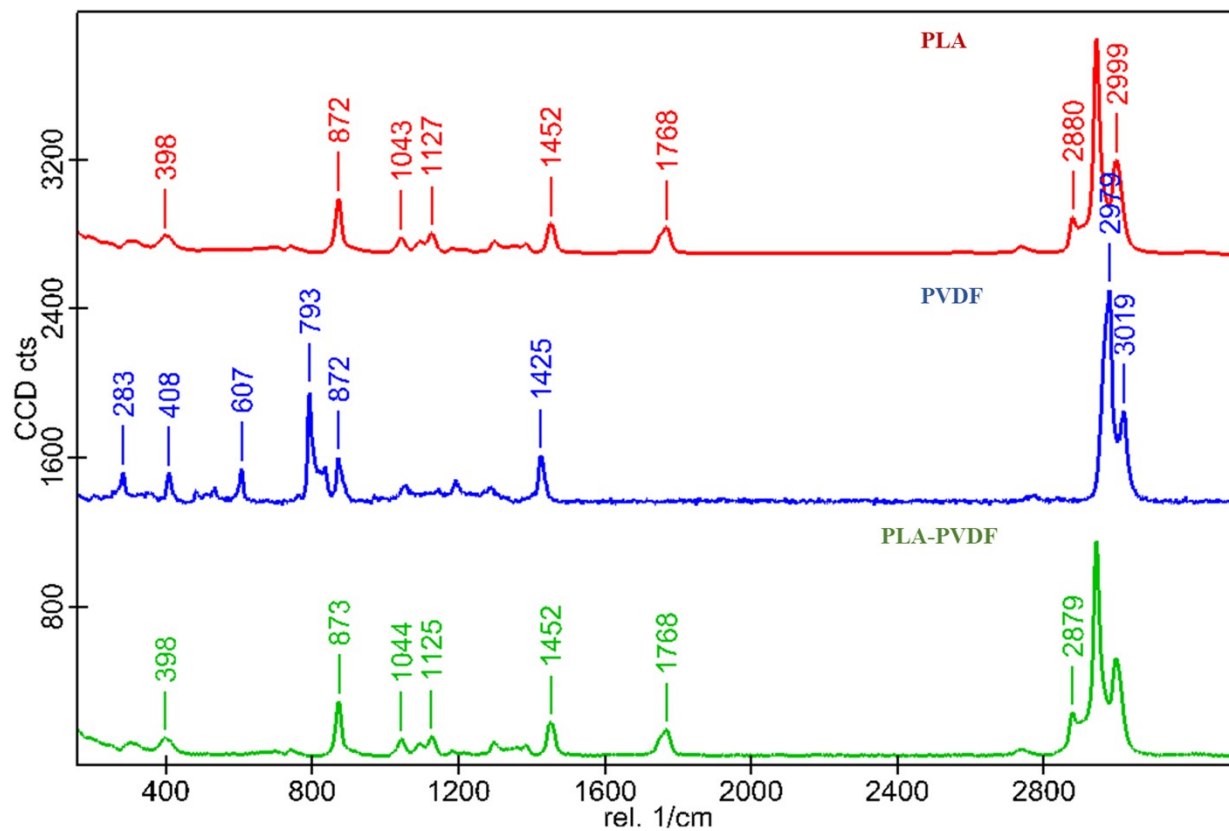

**Figure 2.** Raman Spectra of PLA (Red), PVDF (Blue) and PLA-PVDF (Green) membrane.

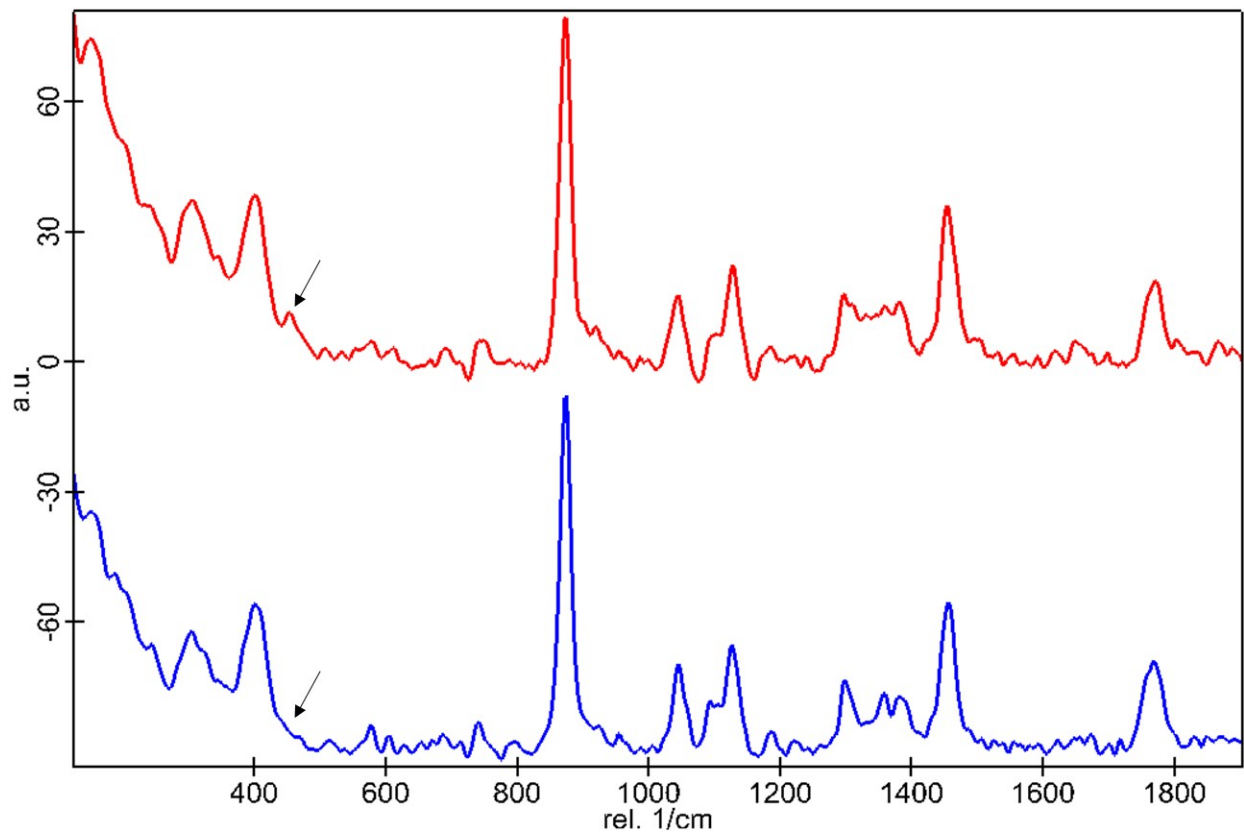

**Figure 3.** Raman Spectra of PLA-PVDF-ZnO membrane, Red: Top Surface, Blue: bottom surface.

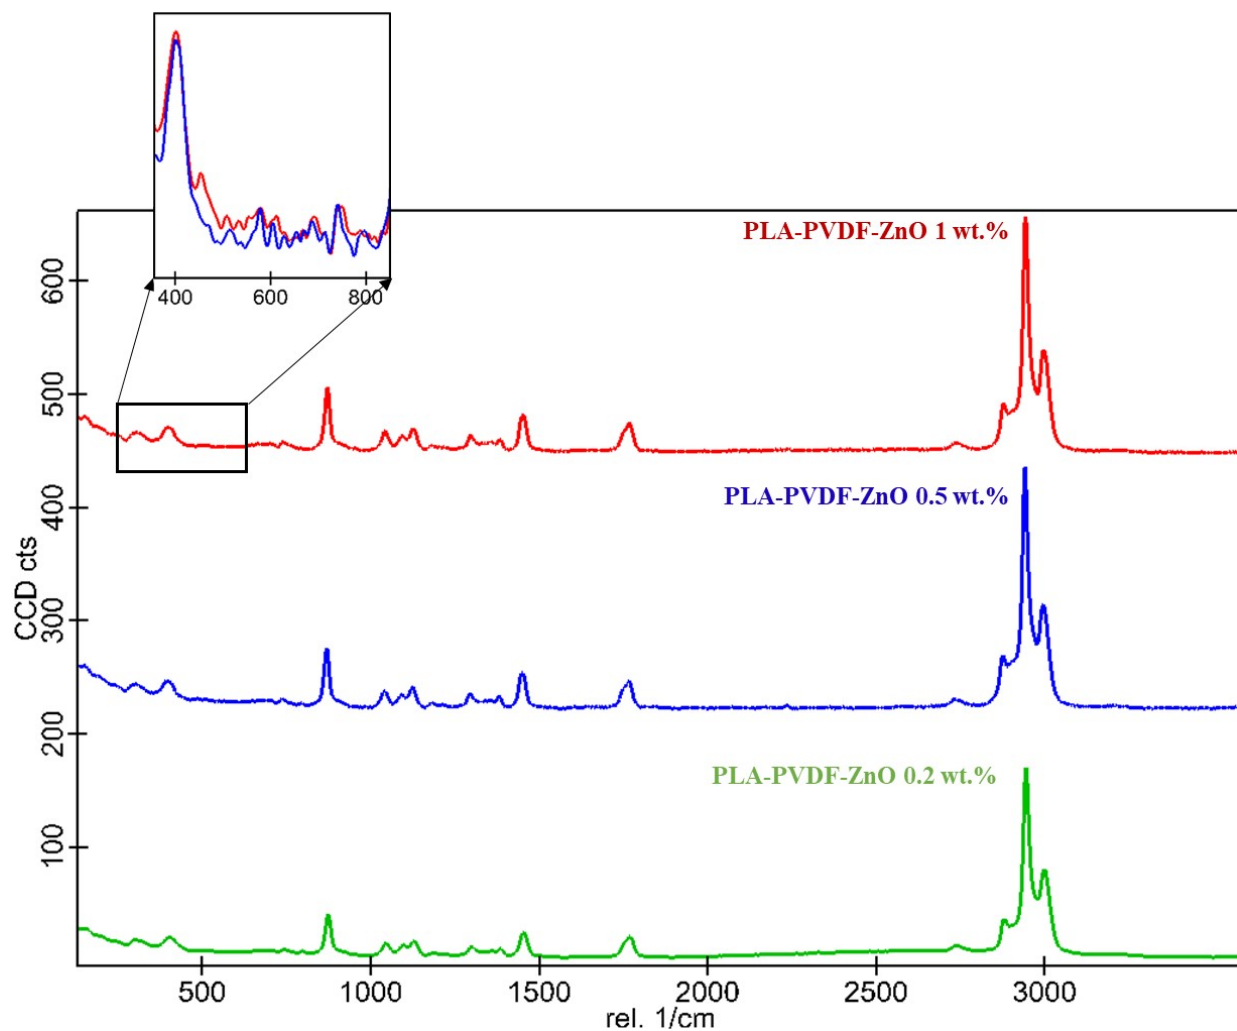

**Figure 4.** Raman Spectra of PLA-PVDF-ZnO 1 wt.% (Red), PLA-PVDF-ZnO 0.5 wt.% (Blue) and PLA-PVDF-ZnO 0.2 wt.% (Green) membranes.

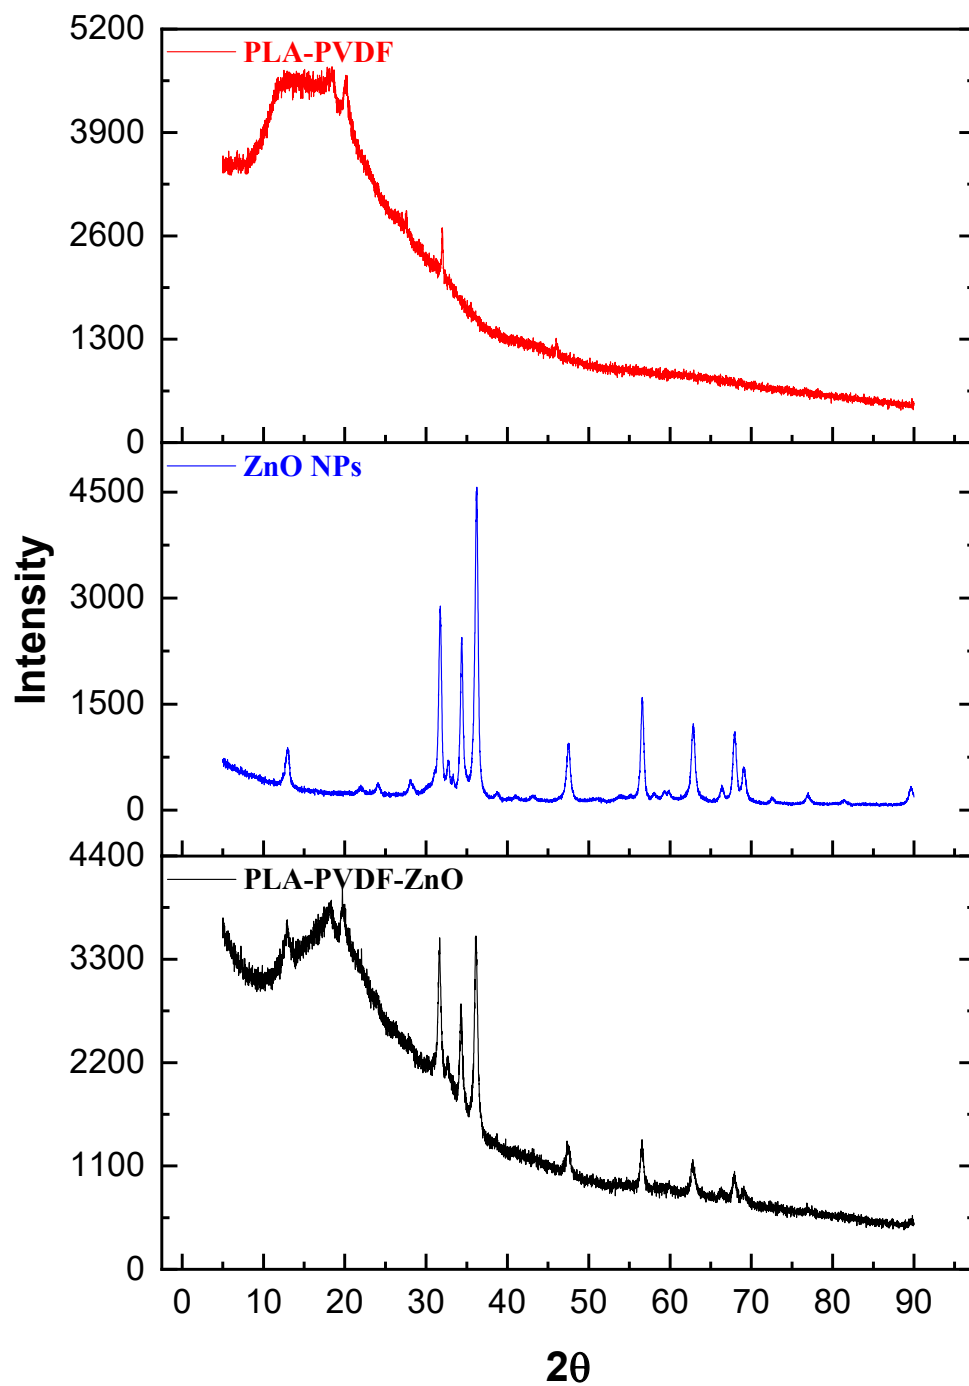

**Figure 5.** XRD pattern of Red: PLA-PVDF, Blue: ZnO NPs and black: PLA-PVDF-ZnO spectra.
